# Supplementary material
Source: PubMed Central journal article supplement (PMC10156164)
Supplement: NIHMS1882689-supplement-1.pdf [file NIHMS1882689-supplement-1.pdf]

## Supplemental Digital Content A: Search strategy

MEDLINE(PubMed) search conducted on May 27, 2022

| Search | Query                                                                                                                                                                                                                                                                                                                                                                                                                                                                                                                                                                                                                                                                                                                                                                                                                                                                                                                                                                                                                                                                                                                                                                                                                                                                                                                                                                                                                                                                                                                                                                                                                                                                                                                                                                                                                                                                                                                                                                                                                                                                                                                                                                                                                                                                                                                                                                                                                                                                                                                                                                                                                                                                                                                                                                                                                                                                                                                                                                                                                                                                                                             | Records retrieved |
|--------|-------------------------------------------------------------------------------------------------------------------------------------------------------------------------------------------------------------------------------------------------------------------------------------------------------------------------------------------------------------------------------------------------------------------------------------------------------------------------------------------------------------------------------------------------------------------------------------------------------------------------------------------------------------------------------------------------------------------------------------------------------------------------------------------------------------------------------------------------------------------------------------------------------------------------------------------------------------------------------------------------------------------------------------------------------------------------------------------------------------------------------------------------------------------------------------------------------------------------------------------------------------------------------------------------------------------------------------------------------------------------------------------------------------------------------------------------------------------------------------------------------------------------------------------------------------------------------------------------------------------------------------------------------------------------------------------------------------------------------------------------------------------------------------------------------------------------------------------------------------------------------------------------------------------------------------------------------------------------------------------------------------------------------------------------------------------------------------------------------------------------------------------------------------------------------------------------------------------------------------------------------------------------------------------------------------------------------------------------------------------------------------------------------------------------------------------------------------------------------------------------------------------------------------------------------------------------------------------------------------------------------------------------------------------------------------------------------------------------------------------------------------------------------------------------------------------------------------------------------------------------------------------------------------------------------------------------------------------------------------------------------------------------------------------------------------------------------------------------------------------|-------------------|
| #1     | ((("Nursing Homes"[Mesh]) OR "Homes for the Aged"[Mesh]) OR "Long-Term Care"[Mesh]) OR ("nursing home"[Title/Abstract] OR "homes for the aged"[Title/Abstract] OR "long-term care"[Title/Abstract])                                                                                                                                                                                                                                                                                                                                                                                                                                                                                                                                                                                                                                                                                                                                                                                                                                                                                                                                                                                                                                                                                                                                                                                                                                                                                                                                                                                                                                                                                                                                                                                                                                                                                                                                                                                                                                                                                                                                                                                                                                                                                                                                                                                                                                                                                                                                                                                                                                                                                                                                                                                                                                                                                                                                                                                                                                                                                                               | 87,433            |
| #2     | (("Terminal Care"[Mesh]) OR "Palliative Care"[Mesh]) OR ("terminal care"[Title/Abstract] OR "End of life care"[Title/Abstract] OR palliat*[Title/Abstract])                                                                                                                                                                                                                                                                                                                                                                                                                                                                                                                                                                                                                                                                                                                                                                                                                                                                                                                                                                                                                                                                                                                                                                                                                                                                                                                                                                                                                                                                                                                                                                                                                                                                                                                                                                                                                                                                                                                                                                                                                                                                                                                                                                                                                                                                                                                                                                                                                                                                                                                                                                                                                                                                                                                                                                                                                                                                                                                                                       | 151,642           |
| #3     | #1 AND #2                                                                                                                                                                                                                                                                                                                                                                                                                                                                                                                                                                                                                                                                                                                                                                                                                                                                                                                                                                                                                                                                                                                                                                                                                                                                                                                                                                                                                                                                                                                                                                                                                                                                                                                                                                                                                                                                                                                                                                                                                                                                                                                                                                                                                                                                                                                                                                                                                                                                                                                                                                                                                                                                                                                                                                                                                                                                                                                                                                                                                                                                                                         | 3,794             |
| #4     | (instrumentation[sh] OR methods[sh] OR "Validation Study"[pt] OR "Comparative Study"[pt] OR "psychometrics"[MeSH] OR psychometr*[tiab] OR clinimetr*[tw] OR clinometr*[tw] OR "outcome assessment, health care"[MeSH] OR "outcome assessment"[tiab] OR "outcome measure*[tw] OR "observer variation"[MeSH] OR "observer variation"[tiab] OR "Health Status Indicators"[Mesh] OR "reproducibility of results"[MeSH] OR reproducib*[tiab] OR "discriminant analysis"[MeSH] OR reliab*[tiab] OR unreliab*[tiab] OR valid*[tiab] OR "coefficient of variation"[tiab] OR coefficient[tiab] OR homogeneity[tiab] OR homogeneous[tiab] OR "internal consistency"[tiab] OR (cronbach*[tiab] AND (alpha[tiab] OR alphas[tiab])) OR (item[tiab] AND (correlation*[tiab] OR selection*[tiab] OR reduction*[tiab])) OR agreement[tw] OR precision[tw] OR imprecision[tw] OR "precise values"[tw] OR test-retest[tiab] OR (test[tiab] AND retest[tiab]) OR (reliab*[tiab] AND (test[tiab] OR retest[tiab])) OR stability[tiab] OR interrater[tiab] OR inter-rater[tiab] OR intrarater[tiab] OR intra-rater[tiab] OR intertester[tiab] OR inter-tester[tiab] OR intratester[tiab] OR intra-tester[tiab] OR interobserver[tiab] OR inter-observer[tiab] OR intraobserver[tiab] OR intra-observer[tiab] OR intertechnician[tiab] OR inter-technician[tiab] OR intratechnician[tiab] OR intra-technician[tiab] OR interexaminer[tiab] OR inter-examiner[tiab] OR intraexaminer[tiab] OR intra-examiner[tiab] OR interassay[tiab] OR inter-assay[tiab] OR intraassay[tiab] OR intra-assay[tiab] OR interindividual[tiab] OR inter-individual[tiab] OR intraindividual[tiab] OR intra-individual[tiab] OR interparticipant[tiab] OR inter-participant[tiab] OR intraparticipant[tiab] OR intra-participant[tiab] OR kappa[tiab] OR kappa's[tiab] OR kappas[tiab] OR repeatab*[tw] OR ((replicab*[tw] OR repeated[tw]) AND (measure[tw] OR measures[tw] OR findings[tw] OR result[tw] OR results[tw] OR test[tw] OR tests[tw])) OR generaliza*[tiab] OR generalisa*[tiab] OR concordance[tiab] OR (intraclass[tiab] AND correlation*[tiab]) OR discriminative[tiab] OR "known group"[tiab] OR "factor analysis"[tiab] OR "factor analyses"[tiab] OR "factor structure"[tiab] OR "factor structures"[tiab] OR dimension*[tiab] OR subscale*[tiab] OR (multitrait[tiab] AND scaling[tiab] AND (analysis[tiab] OR analyses[tiab])) OR "item discriminant"[tiab] OR "interscale correlation*[tiab] OR error[tiab] OR errors[tiab] OR "individual variability"[tiab] OR "interval variability"[tiab] OR "rate variability"[tiab] OR (variability[tiab] AND (analysis[tiab] OR values[tiab])) OR (uncertainty[tiab] AND (measurement[tiab] OR measuring[tiab])) OR "standard error of measurement"[tiab] OR sensitiv*[tiab] OR responsive*[tiab] OR (limit[tiab] AND detection[tiab]) OR "minimal detectable concentration"[tiab] OR interpretab*[tiab] OR ((minimal[tiab] OR minimally[tiab] OR clinical[tiab] OR clinically[tiab]) AND (important[tiab] OR significant[tiab] OR detectable[tiab]) AND (change[tiab] OR difference[tiab])) | 10,759,757        |

|    |                                                                                                                                                                                                                                                                                                                                                                                                                                                                                                                                                                                                                                                                                                                                                                                                                          |           |
|----|--------------------------------------------------------------------------------------------------------------------------------------------------------------------------------------------------------------------------------------------------------------------------------------------------------------------------------------------------------------------------------------------------------------------------------------------------------------------------------------------------------------------------------------------------------------------------------------------------------------------------------------------------------------------------------------------------------------------------------------------------------------------------------------------------------------------------|-----------|
|    | OR (small*[tiab] AND (real[tiab] OR detectable[tiab]) AND (change[tiab] OR difference[tiab])) OR "meaningful change"[tiab] OR "ceiling effect"[tiab] OR "floor effect"[tiab] OR "Item response model"[tiab] OR IRT[tiab] OR Rasch[tiab] OR "Differential item functioning"[tiab] OR DIF[tiab] OR "computer adaptive testing"[tiab] OR "item bank"[tiab] OR "cross-cultural equivalence"[tiab])                                                                                                                                                                                                                                                                                                                                                                                                                           |           |
| #5 | #3 AND #4                                                                                                                                                                                                                                                                                                                                                                                                                                                                                                                                                                                                                                                                                                                                                                                                                | 1,308     |
| #6 | ("address" [Publication Type] OR "biography"[Publication Type] OR "case reports"[Publication Type] OR "comment"[Publication Type] OR "directory"[Publication Type] OR "editorial"[Publication Type] OR "festschrift"[Publication Type] OR "interview"[Publication Type] OR "lecture"[Publication Type] OR "legal case"[Publication Type] OR "legislation"[Publication Type] OR "letter"[Publication Type] OR "news"[Publication Type] OR "newspaper article"[Publication Type] OR "patient education handout"[Publication Type] OR "popular work"[Publication Type] OR "congress"[Publication Type] OR "consensus development conference"[Publication Type] OR "consensus development conference, nih"[Publication Type] OR "practice guideline"[Publication Type]) NOT ("animals"[MeSH Terms] NOT "humans"[MeSH Terms]) | 4,532,358 |
| #7 | #5 NOT #6                                                                                                                                                                                                                                                                                                                                                                                                                                                                                                                                                                                                                                                                                                                                                                                                                | 1,232     |

CINAHL(EBSCO) search conducted on May 27, 2022

| Search | Query                                                                                                                                                                                                                                                                                                                                                                                                                                                                                                                                                                                                                                                                                                                                                                                                                                                                                                                                                                                                                                                                                                                                                                                                                                                                                                                                | Records retrieved |
|--------|--------------------------------------------------------------------------------------------------------------------------------------------------------------------------------------------------------------------------------------------------------------------------------------------------------------------------------------------------------------------------------------------------------------------------------------------------------------------------------------------------------------------------------------------------------------------------------------------------------------------------------------------------------------------------------------------------------------------------------------------------------------------------------------------------------------------------------------------------------------------------------------------------------------------------------------------------------------------------------------------------------------------------------------------------------------------------------------------------------------------------------------------------------------------------------------------------------------------------------------------------------------------------------------------------------------------------------------|-------------------|
| #1     | AB "nursing home" OR AB "homes for the aged" OR AB "long-term care" OR TI "nursing home" OR TI "homes for the aged" OR TI "long-term care" OR (MH "Nursing Homes") OR (MH "Long Term Care") OR (MH "Nursing Home Patients")                                                                                                                                                                                                                                                                                                                                                                                                                                                                                                                                                                                                                                                                                                                                                                                                                                                                                                                                                                                                                                                                                                          | 66,093            |
| #2     | AB "terminal care" OR AB "end of life care" OR AB palliat* OR TI "terminal care" OR TI "end of life care" OR TI palliat* OR (MH "Terminal Care") OR (MH "Palliative Care") OR (MH "Hospice and Palliative Nursing") OR (MH "Palliative Medicine")                                                                                                                                                                                                                                                                                                                                                                                                                                                                                                                                                                                                                                                                                                                                                                                                                                                                                                                                                                                                                                                                                    | 75,200            |
| #3     | #1 AND #2                                                                                                                                                                                                                                                                                                                                                                                                                                                                                                                                                                                                                                                                                                                                                                                                                                                                                                                                                                                                                                                                                                                                                                                                                                                                                                                            | 2,975             |
| #4     | (MH "Psychometrics") or ( TI psychometr* or AB psychometr* ) or ( TI clinimetr* or AB clinimetr* ) or ( TI clinometr* OR AB clinometr* ) or (MH "Outcome Assessment") or ( TI outcome assessment or AB outcome assessment ) or ( TI outcome measure* or AB outcome measure* ) or (MH "Health Status Indicators") or (MH "Reproducibility of Results") or (MH "Discriminant Analysis") or ( ( TI reproducib* or AB reproducib* ) or ( TI reliab* or AB reliab* ) or ( TI unreliab* or AB unreliab* ) ) or ( ( TI valid* or AB valid* ) or ( TI coefficient or AB coefficient ) or ( TI homogeneity or AB homogeneity ) ) or ( TI homogeneous or AB homogeneous ) or ( TI "coefficient of variation" or AB "coefficient of variation" ) or ( TI "internal consistency" or AB "internal consistency" ) or (MH "Internal Consistency+") or (MH "Reliability+") or (MH "Measurement Error+") or (MH "Content Validity+") or "hypothesis testing" or "structural validity" or "cross-cultural validity" or (MH "Criterion-Related Validity+") or "responsiveness" or "interpretability" or ( TI reliab* or AB reliab* ) and ( ( TI test or AB test ) OR (TI retest or AB retest) ) or ( TI stability or AB stability ) or ( TI interrater or AB interrater ) or ( TI inter-rater or AB inter-rater ) or ( TI intrarater or AB intrarater ) | 681,840           |

|    |                                                                                                                                                                                                                                                                                                                                                                                                                                                                                                                                                                                                                                                                                                                                                                                                                                                                                                                                                                                                                                                                                                                                                                                                                                                                                                                                                                                                                                                                                                                                                                                         |       |
|----|-----------------------------------------------------------------------------------------------------------------------------------------------------------------------------------------------------------------------------------------------------------------------------------------------------------------------------------------------------------------------------------------------------------------------------------------------------------------------------------------------------------------------------------------------------------------------------------------------------------------------------------------------------------------------------------------------------------------------------------------------------------------------------------------------------------------------------------------------------------------------------------------------------------------------------------------------------------------------------------------------------------------------------------------------------------------------------------------------------------------------------------------------------------------------------------------------------------------------------------------------------------------------------------------------------------------------------------------------------------------------------------------------------------------------------------------------------------------------------------------------------------------------------------------------------------------------------------------|-------|
|    | or ( TI intra-rater or AB intrarater ) or ( TI intertester or AB intertester) or (TI inter-tester or AB inter-tester) or ( TI intratester or AB intratester) or ( TI intra-tester or AB intra-tester) or ( TI interobserver or AB interobserver) or (TI inter-observer or AB inter-observer ) or ( TI intraobserver or AB intraobserver) or ( TI intra-observer or AB intra-observer) or ( TI intertechnician or AB intertechnician) or (TI inter-technician or AB inter-technician) or ( TI intratechnician or AB intratechnician ) or ( TI intra-technician or AB intra-technician ) or ( TI interexaminer or AB interexaminer ) or (TI inter-examiner or AB inter-examiner) or (TI intraexaminer or AB intraexaminer ) OR (TI intra-examiner or AB intra-examiner ) or (TI intra-examiner or AB intraexaminer ) or (TI interassay or AB interassay ) or ( TI inter-assay or AB inter-assay ) or ( TI intraassay or AB intraassay) or ( TI intra-assay or AB intra-assay ) or (TI interindividual or AB interindividual) or (TI inter-individual or AB inter-individual) OR (TI intraindividual or AB intraindividual) or (TI intra-individual or AB intra-individual) or (TI interparticipant or AB interparticipant) or (TI inter-participant or AB inter-participant ) or (TI intraparticipant or AB intraparticipant) or (TI intra-participant or AB intra-participant ) or (TI kappa or AB kappa) or (TI kappa's or AB kappa's ) or (TI kappas or AB kappas) or (TI repeatab* or AB repeatab*) or ( TI responsive* or AB responsive* ) or ( TI interpretab* or AB interpretab* ) |       |
| #5 | #3 AND #4                                                                                                                                                                                                                                                                                                                                                                                                                                                                                                                                                                                                                                                                                                                                                                                                                                                                                                                                                                                                                                                                                                                                                                                                                                                                                                                                                                                                                                                                                                                                                                               | 316   |
| #6 | (address OR biography OR “case reports” OR comment OR directory OR editorial OR festschrift OR interview OR lecture OR “legal case” OR legislation OR letter OR news OR “newspaper article” OR “patient education handout” OR “popular work” OR congress OR “consensus development conference” OR “consensus development conference, NIH” OR “practice guideline”)                                                                                                                                                                                                                                                                                                                                                                                                                                                                                                                                                                                                                                                                                                                                                                                                                                                                                                                                                                                                                                                                                                                                                                                                                      | 1,569 |
| #7 | #5 NOT #6                                                                                                                                                                                                                                                                                                                                                                                                                                                                                                                                                                                                                                                                                                                                                                                                                                                                                                                                                                                                                                                                                                                                                                                                                                                                                                                                                                                                                                                                                                                                                                               | 316   |

PsycINFO(OVID) search conducted on May 27, 2022

| Search | Query                                                                                                                                                                                                                                                                                                                                                                                                                                                                                                                                                                                                                                                                                                                                                                                                                                                                                                                   | Records retrieved |
|--------|-------------------------------------------------------------------------------------------------------------------------------------------------------------------------------------------------------------------------------------------------------------------------------------------------------------------------------------------------------------------------------------------------------------------------------------------------------------------------------------------------------------------------------------------------------------------------------------------------------------------------------------------------------------------------------------------------------------------------------------------------------------------------------------------------------------------------------------------------------------------------------------------------------------------------|-------------------|
| #1     | nursing home.ab,ti. OR homes for the aged.ab,ti. OR long-term care.ab,ti. OR exp Nursing Homes/ OR exp Long Term Care/                                                                                                                                                                                                                                                                                                                                                                                                                                                                                                                                                                                                                                                                                                                                                                                                  | 20,275            |
| #2     | terminal care.ab,ti. OR end of life care.ab,ti. OR palliat*.ab,ti. OR exp Hospice/ OR exp Palliative Care/ OR exp Terminally Ill Patients/                                                                                                                                                                                                                                                                                                                                                                                                                                                                                                                                                                                                                                                                                                                                                                              | 23,682            |
| #3     | #1 AND #2                                                                                                                                                                                                                                                                                                                                                                                                                                                                                                                                                                                                                                                                                                                                                                                                                                                                                                               | 1131              |
| #4     | (psychometr*.ab,ti. OR clinimetr*.tw. OR clinometr*.tw. OR "outcome assessment".ab,ti. OR "outcome measure*".tw. OR "observer variation".ab,ti. OR reproducib*.ab,ti. OR reliab*.ab,ti. OR unreliab*.ab,ti. OR valid*.ab,ti. OR "coefficient of variation".ab,ti. OR coefficient.ab,ti. OR homogeneity.ab,ti. OR homogeneous.ab,ti. OR "internal consistency".ab,ti. OR (cronbach*.ab,ti. AND (alpha.ab,ti. OR alphas.ab,ti.)) OR (item.ab,ti. AND (correlation*.ab,ti. OR selection*.ab,ti. OR reduction*.ab,ti.)) OR agreement.tw. OR precision.tw. OR imprecision.tw. OR "precise values".tw. OR test-retest.ab,ti. OR (test.ab,ti. AND retest.ab,ti.) OR (reliab*.ab,ti. AND (test.ab,ti. OR retest.ab,ti.)) OR stability.ab,ti. OR interrater.ab,ti. OR inter-rater.ab,ti. OR intrarater.ab,ti. OR intra-rater.ab,ti. OR intertester.ab,ti. OR inter-tester.ab,ti. OR intratester.ab,ti. OR intra-tester.ab,ti. OR | 1,114,638         |

|    |                                                                                                                                                                                                                                                                                                                                                                                                                                                                                                                                                                                                                                                                                                                                                                                                                                                                                                                                                                                                                                                                                                                                                                                                                                                                                                                                                                                                                                                                                                                                                                                                                                                                                                                                                                                                                                                                                                                                                                                                                                                                                                                                                                                                                                                                                                                                                                                                 |     |
|----|-------------------------------------------------------------------------------------------------------------------------------------------------------------------------------------------------------------------------------------------------------------------------------------------------------------------------------------------------------------------------------------------------------------------------------------------------------------------------------------------------------------------------------------------------------------------------------------------------------------------------------------------------------------------------------------------------------------------------------------------------------------------------------------------------------------------------------------------------------------------------------------------------------------------------------------------------------------------------------------------------------------------------------------------------------------------------------------------------------------------------------------------------------------------------------------------------------------------------------------------------------------------------------------------------------------------------------------------------------------------------------------------------------------------------------------------------------------------------------------------------------------------------------------------------------------------------------------------------------------------------------------------------------------------------------------------------------------------------------------------------------------------------------------------------------------------------------------------------------------------------------------------------------------------------------------------------------------------------------------------------------------------------------------------------------------------------------------------------------------------------------------------------------------------------------------------------------------------------------------------------------------------------------------------------------------------------------------------------------------------------------------------------|-----|
|    | interobserver.ab,ti. OR inter-observer.ab,ti. OR intraobserver.ab,ti. OR intra-observer.ab,ti. OR intertechnician.ab,ti. OR inter-technician.ab,ti. OR intratechnician.ab,ti. OR intra-technician.ab,ti. OR interexaminer.ab,ti. OR inter-examiner.ab,ti. OR intraexaminer.ab,ti. OR intra-examiner.ab,ti. OR interassay.ab,ti. OR inter-assay.ab,ti. OR intraassay.ab,ti. OR intra-assay.ab,ti. OR interindividual.ab,ti. OR inter-individual.ab,ti. OR intraindividual.ab,ti. OR intra-individual.ab,ti. OR interparticipant.ab,ti. OR inter-participant.ab,ti. OR intraparticipant.ab,ti. OR intra-participant.ab,ti. OR kappa.ab,ti. OR kappas.ab,ti. OR repeatab*.tw. OR ((replicab*.tw. OR repeated.tw.) AND (measure.tw. OR measures.tw. OR findings.tw. OR result.tw. OR results.tw. OR test.tw. OR tests.tw.)) OR generaliza*.ab,ti. OR generalisa*.ab,ti. OR concordance.ab,ti. OR (intraclass.ab,ti. AND correlation*.ab,ti.) OR discriminative.ab,ti. OR "known group".ab,ti. OR "factor analysis".ab,ti. OR "factor analyses".ab,ti. OR "factor structure".ab,ti. OR "factor structures".ab,ti. OR dimension*.ab,ti. OR subscale*.ab,ti. OR (multitrait.ab,ti. AND scaling.ab,ti. AND (analysis.ab,ti. OR analyses.ab,ti.)) OR "item discriminant".ab,ti. OR "interscale correlation*".ab,ti. OR error.ab,ti. OR errors.ab,ti. OR "individual variability".ab,ti. OR "interval variability".ab,ti. OR "rate variability".ab,ti. OR (variability.ab,ti. AND (analysis.ab,ti. OR values.ab,ti.)) OR (uncertainty.ab,ti. AND (measurement.ab,ti. OR measuring.ab,ti.)) OR "standard error of measurement".ab,ti. OR sensitiv*.ab,ti. OR responsive*.ab,ti. OR (limit.ab,ti. AND detection.ab,ti.) OR "minimal detectable concentration".ab,ti. OR interpretab*.ab,ti. OR ((minimal.ab,ti. OR minimally.ab,ti. OR clinically.ab,ti. OR clinically.ab,ti.) AND (important.ab,ti. OR significant.ab,ti. OR detectable.ab,ti.)) AND (change.ab,ti. OR difference.ab,ti.)) OR (small*.ab,ti. AND (real.ab,ti. OR detectable.ab,ti.)) AND (change.ab,ti. OR difference.ab,ti.)) OR "meaningful change".ab,ti. OR "ceiling effect".ab,ti. OR "floor effect".ab,ti. OR "Item response model".ab,ti. OR IRT.ab,ti. OR Rasch.ab,ti. OR "Differential item functioning".ab,ti. OR DIF.ab,ti. OR "computer adaptive testing".ab,ti. OR "item bank".ab,ti. OR "cross-cultural equivalence".ab,ti.) |     |
| #5 | #3 and #4                                                                                                                                                                                                                                                                                                                                                                                                                                                                                                                                                                                                                                                                                                                                                                                                                                                                                                                                                                                                                                                                                                                                                                                                                                                                                                                                                                                                                                                                                                                                                                                                                                                                                                                                                                                                                                                                                                                                                                                                                                                                                                                                                                                                                                                                                                                                                                                       | 209 |

#### EMBASE(OVID) search conducted on May 27, 2022

| Search | Query                                                                                                                                                                                                                                                                                                                                                                                                                                                                                                                                                                                                                                                                                                                                                                                                                         | Records retrieved |
|--------|-------------------------------------------------------------------------------------------------------------------------------------------------------------------------------------------------------------------------------------------------------------------------------------------------------------------------------------------------------------------------------------------------------------------------------------------------------------------------------------------------------------------------------------------------------------------------------------------------------------------------------------------------------------------------------------------------------------------------------------------------------------------------------------------------------------------------------|-------------------|
| #1     | 'nursing home':ab,ti OR 'home for the aged':ab,ti OR 'long-term care':ab,ti                                                                                                                                                                                                                                                                                                                                                                                                                                                                                                                                                                                                                                                                                                                                                   | 57,433            |
| #2     | 'terminal care':ab,ti OR 'end of life care':ab,ti OR palliat*:ab,ti                                                                                                                                                                                                                                                                                                                                                                                                                                                                                                                                                                                                                                                                                                                                                           | 144,907           |
| #3     | #1 AND #2                                                                                                                                                                                                                                                                                                                                                                                                                                                                                                                                                                                                                                                                                                                                                                                                                     | 2,405             |
| #4     | 'intermethod comparison'/exp OR 'data collection method'/exp OR 'validation study'/exp OR 'feasibility study'/exp OR 'pilot study'/exp OR 'psychometry'/exp OR 'reproducibility'/exp OR reproducib*:ab,ti OR 'audit':ab,ti OR psychometr*:ab,ti OR clinimetr*:ab,ti OR clinometr*:ab,ti OR 'observer variation'/exp OR 'observer variation':ab,ti OR 'discriminant analysis'/exp OR 'validity'/exp OR reliab*:ab,ti OR valid*:ab,ti OR 'coefficient':ab,ti OR 'internal consistency':ab,ti OR (cronbach*:ab,ti AND ('alpha':ab,ti OR 'alphas':ab,ti)) OR 'item correlation':ab,ti OR 'item correlations':ab,ti OR 'item selection':ab,ti OR 'item selections':ab,ti OR 'item reduction':ab,ti OR 'item reductions':ab,ti OR 'agreement':ab,ti OR 'precision':ab,ti OR 'imprecision':ab,ti OR 'precise values':ab,ti OR 'test- | 7,182,249         |

|    |                                                                                                                                                                                                                                                                                                                                                                                                                                                                                                                                                                                                                                                                                                                                                                                                                                                                                                                                                                                                                                                                                                                                                                                                                                                                                                                                                                                                                                                                                                                                                                                                                                                                                                                                                                                                                                                                                                                                                                                                                                                                                                                                                                                                                                                                                                                                                                                                                                                                                                                                                                                                                                                                                                                                                                                                                                                                                                                                                                                                                                                                                                         |           |
|----|---------------------------------------------------------------------------------------------------------------------------------------------------------------------------------------------------------------------------------------------------------------------------------------------------------------------------------------------------------------------------------------------------------------------------------------------------------------------------------------------------------------------------------------------------------------------------------------------------------------------------------------------------------------------------------------------------------------------------------------------------------------------------------------------------------------------------------------------------------------------------------------------------------------------------------------------------------------------------------------------------------------------------------------------------------------------------------------------------------------------------------------------------------------------------------------------------------------------------------------------------------------------------------------------------------------------------------------------------------------------------------------------------------------------------------------------------------------------------------------------------------------------------------------------------------------------------------------------------------------------------------------------------------------------------------------------------------------------------------------------------------------------------------------------------------------------------------------------------------------------------------------------------------------------------------------------------------------------------------------------------------------------------------------------------------------------------------------------------------------------------------------------------------------------------------------------------------------------------------------------------------------------------------------------------------------------------------------------------------------------------------------------------------------------------------------------------------------------------------------------------------------------------------------------------------------------------------------------------------------------------------------------------------------------------------------------------------------------------------------------------------------------------------------------------------------------------------------------------------------------------------------------------------------------------------------------------------------------------------------------------------------------------------------------------------------------------------------------------------|-----------|
|    | <p>retest':ab,ti OR ('test':ab,ti AND 'retest':ab,ti) OR (reliab*:ab,ti AND ('test':ab,ti OR 'retest':ab,ti)) OR 'stability':ab,ti OR 'interrater':ab,ti OR 'inter-rater':ab,ti OR 'intra-rater':ab,ti OR 'intra-rater':ab,ti OR 'intertester':ab,ti OR 'inter-tester':ab,ti OR 'intratester':ab,ti OR 'interobeserver':ab,ti OR 'inter-observer':ab,ti OR 'intraobserver':ab,ti OR 'intertechnician':ab,ti OR 'inter-technician':ab,ti OR 'intra technician':ab,ti OR 'interexaminer':ab,ti OR 'inter-examiner':ab,ti OR 'intraexaminer':ab,ti OR 'interassay':ab,ti OR 'inter-assay':ab,ti OR 'intraassay':ab,ti OR 'intra-assay':ab,ti OR 'interindividual':ab,ti OR 'inter-individual':ab,ti OR 'intraindividual':ab,ti OR 'intra-individual':ab,ti OR 'interparticipant':ab,ti OR 'inter-participant':ab,ti OR 'intraparticipant':ab,ti OR 'kappa':ab,ti OR 'kappas':ab,ti OR 'coefficient of variation':ab,ti OR repeatab*:ab,ti OR ((replicab*:ab,ti OR 'repeated':ab,ti) AND ('measure':ab,ti OR 'measures':ab,ti OR 'findings':ab,ti OR 'result':ab,ti OR 'results':ab,ti OR 'test':ab,ti OR 'tests':ab,ti)) OR generaliza*:ab,ti OR generalisa*:ab,ti OR 'concordance':ab,ti OR ('intra class':ab,ti AND correlation*:ab,ti) OR 'discriminative':ab,ti OR 'known group':ab,ti OR 'factor analysis':ab,ti OR 'factor analyses':ab,ti OR 'factor structure':ab,ti OR 'factor structures':ab,ti OR 'dimensionality':ab,ti OR subscale*:ab,ti OR 'multitrait scaling analysis':ab,ti OR 'multitrait scaling analyses':ab,ti OR 'item discriminant':ab,ti OR 'interscale correlation':ab,ti OR 'interscale correlations':ab,ti OR (('error':ab,ti OR 'errors':ab,ti) AND (measure*:ab,ti OR correlat*:ab,ti OR evaluat*:ab,ti OR 'accuracy':ab,ti OR 'accurate':ab,ti OR 'precision':ab,ti OR 'mean':ab,ti)) OR 'individual variability':ab,ti OR 'interval variability':ab,ti OR 'rate variability':ab,ti OR 'variability analysis':ab,ti OR ('uncertainty':ab,ti AND ('measurement':ab,ti OR 'measuring':ab,ti)) OR 'standard error of measurement':ab,ti OR sensitiv*:ab,ti OR responsive*:ab,ti OR ('limit':ab,ti AND 'detection':ab,ti) OR 'minimal detectable concentration':ab,ti OR interpretab*:ab,ti OR (small*:ab,ti AND ('real':ab,ti OR 'detectable':ab,ti) AND ('change':ab,ti OR 'difference':ab,ti)) OR 'meaningful change':ab,ti OR 'minimal important change':ab,ti OR 'minimal important difference':ab,ti OR 'minimally important change':ab,ti OR 'minimally important difference':ab,ti OR 'minimal detectable change':ab,ti OR 'minimal detectable difference':ab,ti OR 'minimally detectable change':ab,ti OR 'minimally detectable difference':ab,ti OR 'minimal real change':ab,ti OR 'minimal real difference':ab,ti OR 'minimally real change':ab,ti OR 'minimally real difference':ab,ti OR 'ceiling effect':ab,ti OR 'floor effect':ab,ti OR 'item response model':ab,ti OR 'irt':ab,ti OR 'rasch':ab,ti OR 'differential item functioning':ab,ti OR 'dif':ab,ti OR 'computer adaptive testing':ab,ti OR 'item bank':ab,ti OR 'cross-cultural equivalence':ab,ti</p> |           |
| #5 | #3 AND #4                                                                                                                                                                                                                                                                                                                                                                                                                                                                                                                                                                                                                                                                                                                                                                                                                                                                                                                                                                                                                                                                                                                                                                                                                                                                                                                                                                                                                                                                                                                                                                                                                                                                                                                                                                                                                                                                                                                                                                                                                                                                                                                                                                                                                                                                                                                                                                                                                                                                                                                                                                                                                                                                                                                                                                                                                                                                                                                                                                                                                                                                                               | 854       |
| #6 | (address OR biography OR 'case report'/exp OR comment OR 'directory'/exp OR 'editorial'/exp OR festschrift OR 'interview'/exp OR 'law'/exp OR lecture OR legislation OR 'letter'/exp OR news OR 'newspaper article' OR 'consensus development'/exp OR congress OR 'patient education handout' OR 'popular work' OR 'practice guideline'/exp) NOT ([animals]/lim NOT [humans]/lim)                                                                                                                                                                                                                                                                                                                                                                                                                                                                                                                                                                                                                                                                                                                                                                                                                                                                                                                                                                                                                                                                                                                                                                                                                                                                                                                                                                                                                                                                                                                                                                                                                                                                                                                                                                                                                                                                                                                                                                                                                                                                                                                                                                                                                                                                                                                                                                                                                                                                                                                                                                                                                                                                                                                       | 7,069,541 |
| #7 | #5 NOT #6                                                                                                                                                                                                                                                                                                                                                                                                                                                                                                                                                                                                                                                                                                                                                                                                                                                                                                                                                                                                                                                                                                                                                                                                                                                                                                                                                                                                                                                                                                                                                                                                                                                                                                                                                                                                                                                                                                                                                                                                                                                                                                                                                                                                                                                                                                                                                                                                                                                                                                                                                                                                                                                                                                                                                                                                                                                                                                                                                                                                                                                                                               | 427       |

Supplemental Digital Content B: Studies ineligible following full text review

| Reference                                                                                                                                                                                                                                                                                                | First reason for exclusion                                                                                                              |
|----------------------------------------------------------------------------------------------------------------------------------------------------------------------------------------------------------------------------------------------------------------------------------------------------------|-----------------------------------------------------------------------------------------------------------------------------------------|
| <sup>59</sup> Abbey, J., N. Piller, A. De Bellis, A. Esterman, D. Parker, L. Giles, and B. Lowcay, <i>The Abbey pain scale: a 1-minute numerical indicator for people with end-stage dementia</i> . International journal of palliative nursing, 2004. <b>10</b> (1): p. 6-13.                           | Criterion 3<br>Intent was measuring pain in patients with end-stage dementia, not to identify patients for referral to palliative care. |
| <sup>60</sup> Brechtel, J.R., S. Murshed, P. Homel, and M. Bookbinder, <i>Monitoring symptoms in patients with advanced illness in long-term care: A pilot study</i> . J Pain Symptom Manage, 2006. <b>32</b> (2): p. 168-74.                                                                            | Criterion 2<br>AIDS; younger                                                                                                            |
| <sup>61</sup> Casarett, D., J. Karlawish, K. Morales, R. Crowley, T. Mirsch, and D.A. Asch, <i>Improving the use of hospice services in nursing homes: a randomized controlled trial</i> . Jama, 2005. <b>294</b> (2): p. 211-7.                                                                         | Criterion 3<br>Hospice evaluation                                                                                                       |
| <sup>62</sup> David, D. and C. Ritchie, <i>Systematic Assessment of PC Need in Nursing Home Residents;An Approach to Improve Care (GP720)</i> . Journal of Pain and Symptom Management, 2020. <b>60</b> (1): p. 257.                                                                                     | Conference abstract only                                                                                                                |
| <sup>63</sup> De Roo, M.L., A. Uyttersprot, M. Petrovic, A. Velghne, R. Piers, and N. Van Den Noortgate, <i>First steps toward validation of a symptom scale for palliative elderly</i> . Palliative medicine, 2010. <b>24</b> : p. S201-S201                                                            | Conference abstract only                                                                                                                |
| <sup>64</sup> De Roo, M.L., M.F. Tanghe, N.J. Van Den Noortgate, and R.D. Piers, <i>Development and Validation of the Symptom Assessment to Improve Symptom Control for Institutionalized Elderly Scale</i> . Journal of the American Medical Directors Association, 2018. <b>19</b> (2): p. 148-153.e5. | Criterion 3<br>Intended for patients already enrolled in palliative care, not to identify patients for referral to palliative care.     |
| <sup>65</sup> Dunckley, M., F. Aspinall, J.M. Addington-Hall, R. Hughes, and I.J. Higginson, <i>A research study to identify facilitators and barriers to outcome measure implementation</i> . Int J Palliat Nurs, 2005. <b>11</b> (5): p. 218-25.                                                       | Criterion 1                                                                                                                             |
| <sup>20</sup> Dupont, C., R. De Schreye, J. Cohen, M. De Ridder, L. Van den Block, L. Deliens, and K. Leemans, <i>Pilot Study to Develop and Test Palliative Care Quality Indicators for Nursing Homes</i> . Int J Environ Res Public Health, 2021. <b>18</b> (2).                                       | Criterion 1<br>Quality indicators                                                                                                       |
| <sup>66</sup> Eagar, K., R. Gordon, M.F. Snoek, C. Loggie, A. Westera, P.D. Samsa, and C. Kobel, <i>The Australian National Aged Care Classification (AN-ACC): a new casemix classification for residential aged care</i> . Med J Aust, 2020. <b>213</b> (8): p. 359-363.                                | Criterion 1<br>Funding model                                                                                                            |
| <sup>67</sup> Ellis-Smith, C., C.J. Evans, F.E. Murtagh, L.A. Henson, A.M. Firth, I.J. Higginson, and B.A. Daveson, <i>Development of a caregiver-reported measure to support systematic assessment of people with</i>                                                                                   | Criterion 3<br>Outcome focused                                                                                                          |

|                                                                                                                                                                                                                                                                                                                                 |                                                                                                                                        |
|---------------------------------------------------------------------------------------------------------------------------------------------------------------------------------------------------------------------------------------------------------------------------------------------------------------------------------|----------------------------------------------------------------------------------------------------------------------------------------|
| <i>dementia in long-term care: The Integrated Palliative care Outcome Scale for Dementia</i> . Palliat Med, 2017. <b>31</b> (7): p. 651-660.                                                                                                                                                                                    |                                                                                                                                        |
| <sup>68</sup> Gómez-Batiste, X., M. Martínez-Muñoz, C. Blay, J. Amblàs, L. Vila, X. Costa, . . . G.K. Mitchell, <i>Prevalence and characteristics of patients with advanced chronic conditions in need of palliative care in the general population: a cross-sectional study</i> . Palliat Med, 2014. <b>28</b> (4): p. 302-11. | Criterion 4<br>Used NEC-PAL in a prevalence study but did not evaluate the tool                                                        |
| <sup>69</sup> Grager, D., S. Oakes, F. Washington, E. Villareal, and K. Mora, <i>Implementation of a palliative care program at Buena Vida Nursing and Rehab Center: a quality improvement project in advance care planning</i> . Journal Of The American Geriatrics Society, 2013. <b>61</b> (s1): p. S217.                    | Conference abstract                                                                                                                    |
| <sup>70</sup> Greenberg, L., M.S. Lantz, A. Likourezos, O.R. Burack, E. Chichin, and J. Carter, <i>Screening for depression in nursing home palliative care patients</i> . J Geriatr Psychiatry Neurol, 2004. <b>17</b> (4): p. 212-8.                                                                                          | Criterion 3<br>Used for patients already enrolled in palliative care                                                                   |
| <sup>71</sup> Hermans, K., J. De Almeida Mello, N. Spruytte, J. Cohen, C. Van Audenhove, and A. Declercq, <i>A comparative analysis of comprehensive geriatric assessments for nursing home residents receiving palliative care: a systematic review</i> . J Am Med Dir Assoc, 2014. <b>15</b> (7): p. 467-476.                 | Systematic Review                                                                                                                      |
| <sup>72</sup> Hermans, K., N. Spruytte, J. Cohen, C. Van Audenhove, and A. Declercq, <i>Usefulness, feasibility and face validity of the interRAI palliative care instrument according to care professionals in nursing homes: A qualitative study</i> . International Journal of Nursing Studies, 2016. <b>62</b> : p. 90-99.  | Criterion 3<br>Used for patients already enrolled in palliative care; outcome measure                                                  |
| <sup>73</sup> Hirdes, J.P., G. Ljunggren, J.N. Morris, D.H. Frijters, H. Finne Soveri, L. Gray, . . . R. Gilgen, <i>Reliability of the interRAI suite of assessment instruments: a 12-country study of an integrated health information system</i> . BMC Health Serv Res, 2008. <b>8</b> : p. 277.                              | Criterion 1<br>Not focused on palliative care                                                                                          |
| <sup>74</sup> Kaasalainen, S., N. Stewart, J. Middleton, S. Knezacek, T. Hartley, C. Ife, and L. Robinson, <i>Development and evaluation of the Pain Assessment in the Communicatively Impaired (PACI) tool: part I</i> . International journal of palliative nursing, 2011. <b>17</b> (8): p. 387-391.                         | Criterion 3<br>Not intended for discriminating who needs palliative care. Intent was to identify pain, not to determine referral to PC |
| <sup>75</sup> Kiely, D.K., M.L. Shaffer, S.L. Mitchell, D.K. Kiely, M.L. Shaffer, and S.L. Mitchell, <i>Scales for the evaluation of end-of-life care in advanced dementia: sensitivity to change</i> . Alzheimer Disease & Associated Disorders, 2012. <b>26</b> (4): p. 358-363.                                              | Criterion 3<br>End of life; outcome measure                                                                                            |
| <sup>76</sup> Linklater, G., S. Lawton, S. Fielding, L. Macaulay, D. Carroll, and D. Pang, <i>Introducing the Palliative Performance Scale to clinicians: the Grampian experience</i> . BMJ Support Palliat Care, 2012. <b>2</b> (2): p. 121-6.                                                                                 | Criterion 3<br>Used for patients already enrolled in palliative care; outcome measure                                                  |

|                                                                                                                                                                                                                                                                                                                                                                                                                          |                                                                                                                                                          |
|--------------------------------------------------------------------------------------------------------------------------------------------------------------------------------------------------------------------------------------------------------------------------------------------------------------------------------------------------------------------------------------------------------------------------|----------------------------------------------------------------------------------------------------------------------------------------------------------|
| <sup>77</sup> Puente-Fernández, D., E. Palma-Ayllón, M.R. Sánchez-García, C. Hueso-Montoro, A.A. Esteban-Burgos, and R. Montoya-Juárez, <i>Development of a Scale Based on Nursing Outcome Classification “Dignified Life Closure” (1307) to Assess End-of-Life Dignity of Patients in Care Homes for the Elderly</i> . <i>Int J Nurs Knowl</i> , 2020. <b>31</b> (1): p. 44-49                                          | Criterion 1<br>Dignified death                                                                                                                           |
| <sup>78</sup> Schwartz, C.E., M.P. Merriman, G. Reed, and I. Byock, <i>Evaluation of the Missoula-VITAS Quality of Life Index—revised: research tool or clinical tool?</i> <i>J Palliat Med</i> , 2005. <b>8</b> (1): p. 121-35.                                                                                                                                                                                         | Criterion 1<br>Quality of Life                                                                                                                           |
| <sup>79</sup> Spichiger, F., A. Keller Senn, T. Volken, P. Larkin, and A. Koppitz, <i>Integrated Palliative Outcome Scale for People with Dementia: easy language adaptation and translation</i> . <i>J Patient Rep Outcomes</i> , 2022. <b>6</b> (1): p. 14.                                                                                                                                                            | Criterion 3<br>Translation of an outcome focused measure                                                                                                 |
| <sup>2</sup> Stephens, C.E., L.J. Hunt, N. Bui, E. Halifax, C.S. Ritchie, and S.J. Lee, <i>Palliative Care Eligibility, Symptom Burden, and Quality-of-Life Ratings in Nursing Home Residents</i> . <i>JAMA internal medicine</i> , 2018. <b>178</b> (1): p. 141-142                                                                                                                                                     | Criterion 4<br>Used INTER-ACT tool – Identifying Resident Who May be Eligible for Hospice or Palliative Care/Comfort Order but no evaluation of the tool |
| <sup>80</sup> Temkin-Greener, H., N.T. Zheng, S.A. Norton, T. Quill, S. Ladwig, and P. Veazie, <i>Measuring end-of-life care processes in nursing homes</i> . <i>Gerontologist</i> , 2009. <b>49</b> (6): p. 803-15.                                                                                                                                                                                                     | Criterion 1<br>Focused on end-of-life care processes                                                                                                     |
| <sup>81</sup> Teresi, J.A., K. Ocepek-Welikson, J.A. Toner, M. Kleinman, M. Ramirez, J.P. Eimicke, . . . A. Siu, <i>Methodological issues in measuring subjective well-being and quality-of-life: Applications to assessment of affect in older, chronically and cognitively impaired, ethnically diverse groups using the Feeling Tone Questionnaire</i> . <i>Appl Res Qual Life</i> , 2017. <b>12</b> (2): p. 251-288. | Criterion 1                                                                                                                                              |
| <sup>82</sup> Thompson, G., <i>Dying in long-term care: family satisfaction as an outcome measure</i> . <i>Journal of Palliative Care</i> , 2006. <b>22</b> (3): p. 247-247.                                                                                                                                                                                                                                             | Conference abstract only                                                                                                                                 |
| <sup>83</sup> Toye, C., H. Walker, L.J. Kristjanson, A. Popescu, and E. Nightingale, <i>Measuring symptom distress among frail elders capable of providing self reports</i> . <i>Nursing &amp; Health Sciences</i> , 2005. <b>7</b> (3): p. 184-191.                                                                                                                                                                     | Criterion 2<br>Assisted living (Hostel care, Australia)                                                                                                  |
| <sup>84</sup> van Iersel, T., D. Timmerman, and A. Mullie, <i>Introduction of a pain scale for palliative care patients with cognitive impairment</i> . <i>International journal of palliative nursing</i> , 2006. <b>12</b> (2): p. 54-59.                                                                                                                                                                              | Criterion 1<br>Intended to be used with cognitively impaired palliative care patients.                                                                   |

Inclusion criteria recommended by the COSMIN guidelines for systematic reviews of measurement properties.

1. The instrument should measure the construct of interest (identification of residents in need of palliative care).
2. The study sample should concern the target population of interest (older adults living in a nursing home).
3. The study should concern the type of measurement instrument of interest (palliative care screening tool).
4. The aim of the study should be the development or evaluation of one or more measurement properties
